# Supplementary material for: A perioperative nursing care protocol for patients with spinal muscular atrophy (SMA) type II or type III undergoing spinal surgery: a 4-year experience in 24 patients
Source: Springer Nature journal article supplement (doi:10.1186/s13023-025-03718-z), 2025-05-19
Supplement: MOESM1 [file 13023_2025_3718_MOESM1_ESM.pdf]

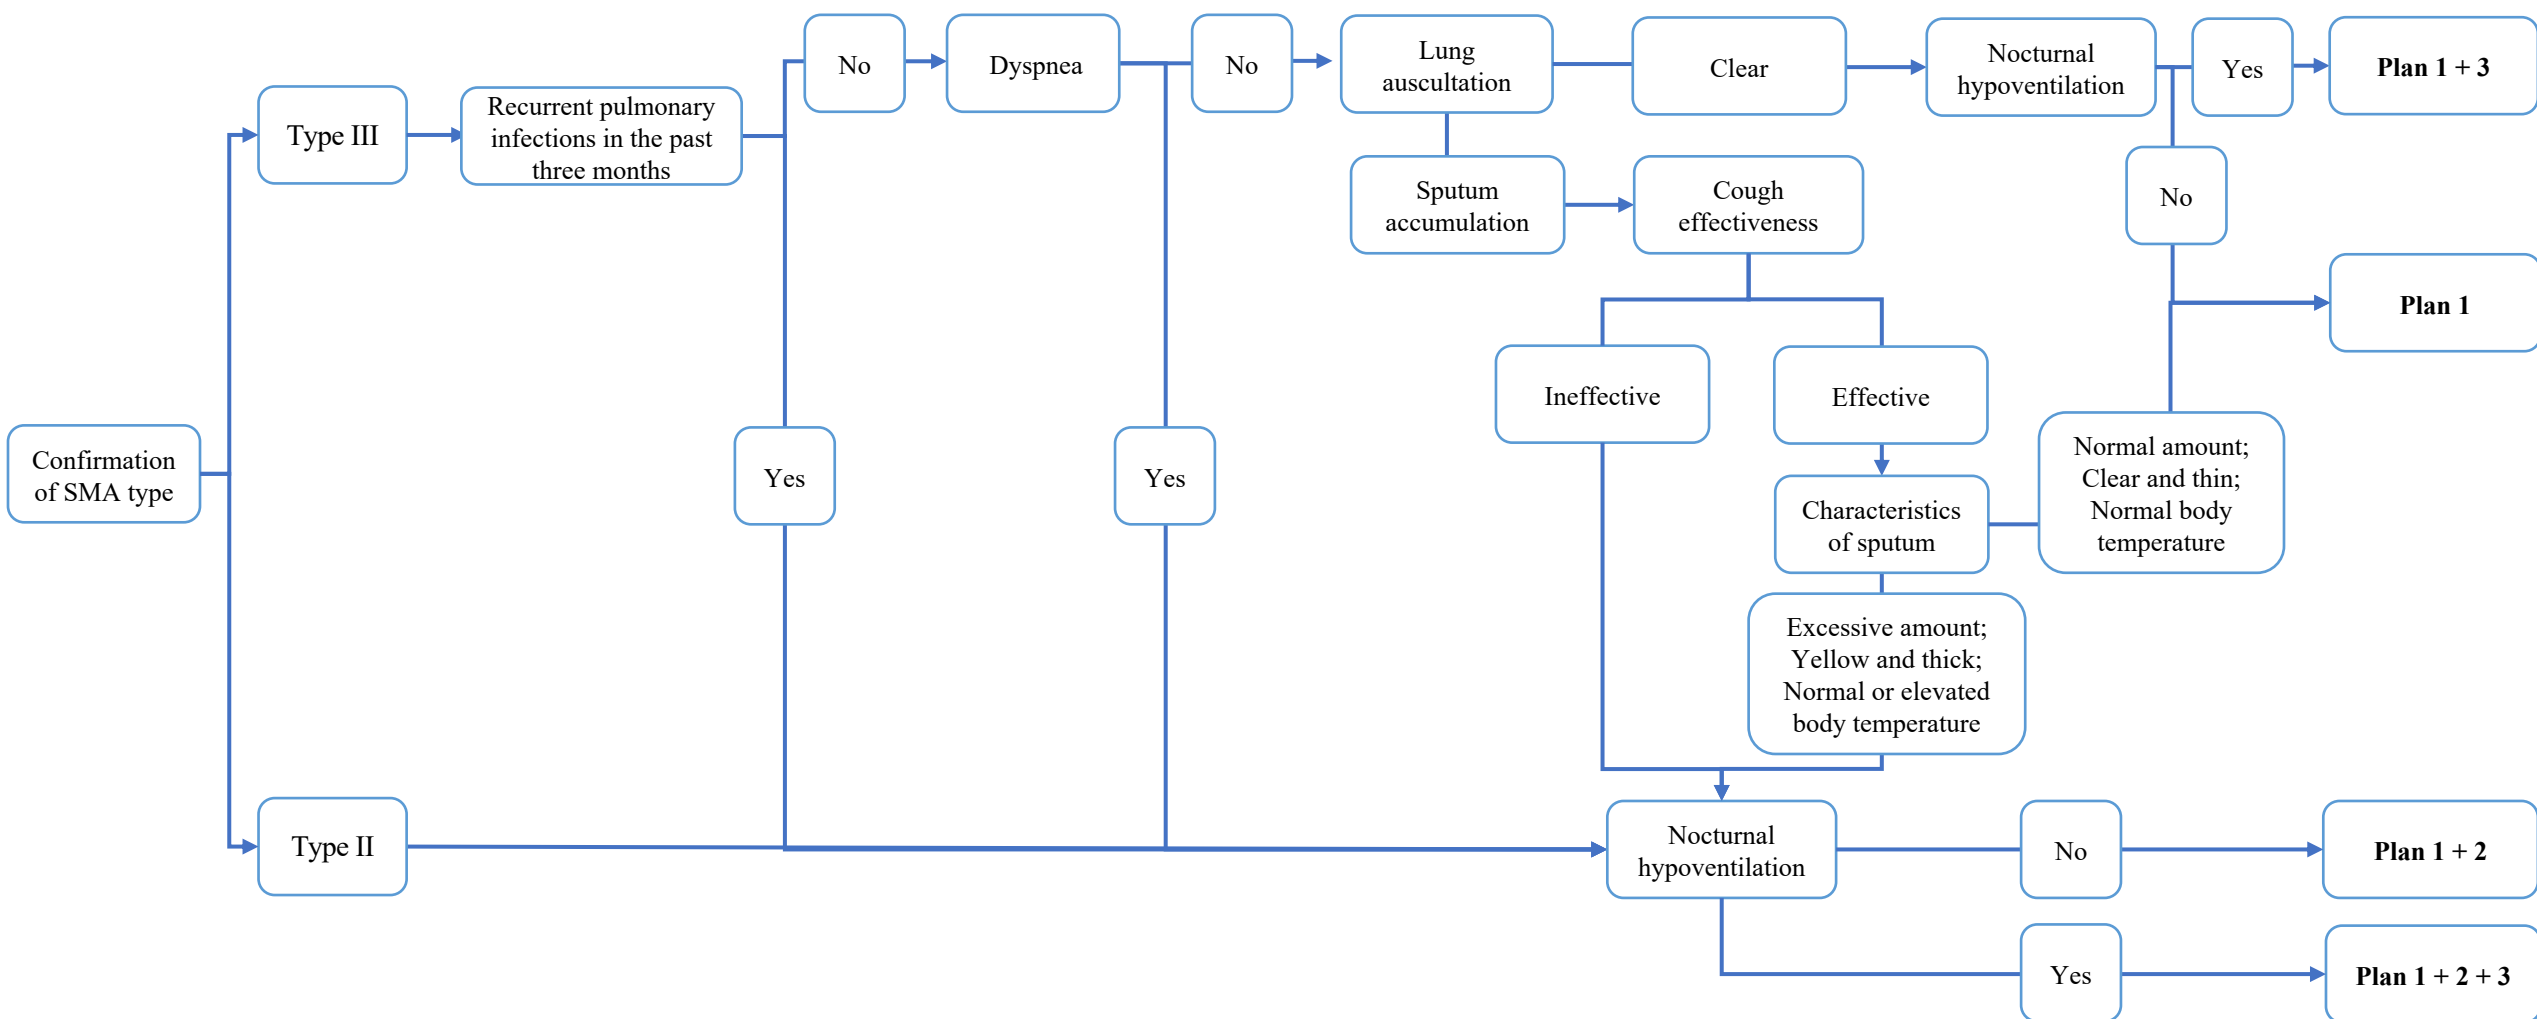

**Supplementary Figure 1. Detailed respiratory care protocol**
